# Supplementary material for: Eco-Friendly Synthesis and Antiproliferative Evaluation of Some Oxygen Substituted Diaryl Ketones
Source: PubMed Central journal article supplement (PMC6270201; doi:10.3390/molecules18089818), 2013-08-16
Supplement: molecules-18-09818-s001.pdf [file molecules-18-09818-s001.pdf]

# Supplementary Materials

## CHECK LIST

| COMPOUNDS NUMBER | IR | <sup>1</sup> H NMR | <sup>13</sup> C NMR | HRMS | Mp |
|------------------|----|--------------------|---------------------|------|----|
| 3                | +  | +                  | +                   | +    | +  |
| 4                | +  | +                  | +                   | +    | +  |
| 5                | +  | +                  | +                   | +    | +  |
| 6                | +  | +                  | +                   | +    | +  |
| 7                | +  | +                  | +                   | +    | +  |
| 8                | +  | +                  | +                   | +    | +  |
| 9                | +  | +                  | +                   | +    | +  |
| 10               | +  | +                  | +                   | +    | +  |
| 11               | +  | +                  | +                   | +    | +  |
| 12               | +  | +                  | +                   | +    | +  |
| 13               | +  | +                  | +                   | +    | +  |
| 14               | +  | +                  | +                   | +    | +  |
| 15               | +  | +                  | +                   | +    | +  |
| 16               | +  | +                  | +                   | +    | +  |
| 17               | +  | +                  | +                   | +    | +  |
| 18               | +  | +                  | +                   | +    | +  |
| 19               | +  | +                  | +                   | +    | +  |
| 20               | +  | +                  | +                   | +    | +  |
| 21               | +  | +                  | +                   | +    | +  |
| 22               | +  | +                  | +                   | +    | +  |
| 23               | +  | +                  | +                   | +    | +  |
